# Supplementary material
Source: MDPI journal article supplement (https://www.mdpi.com/2073-445X/11/4/464)
Supplement: s1 [file s1]

Table S1. Summary of the effects of factorial ANOVA for the interaction between factors “sampling times” (Times) and “vegetal cover” (COV), using the average density of the soil macrofauna, its families richness and diversity.

| Attribute | Effect    | SS          | Degr. Of Freedom | MS         | F      | <i>p</i> |
|-----------|-----------|-------------|------------------|------------|--------|----------|
| Density   | Times     | 4220000.000 | 6.000            | 703000.000 | 3.267  | 0.009    |
|           | COV       | 312000.000  | 2.000            | 156000.000 | 0.725  | 0.490    |
|           | Times*COV | 3040000.000 | 12.000           | 254000.000 | 1.180  | 0.326    |
| Richness  | Times     | 526.700     | 6.000            | 87.780     | 18.390 | 0.000    |
|           | COV       | 47.600      | 2.000            | 23.820     | 4.990  | 0.011    |
|           | Times*COV | 214.400     | 12.000           | 17.870     | 3.740  | 0.001    |
| Diversity | Times     | 209.600     | 6.000            | 34.940     | 13.090 | 0.000    |
|           | COV       | 45.400      | 2.000            | 22.710     | 8.510  | 0.001    |
|           | Times*COV | 157.700     | 12.000           | 13.140     | 4.920  | 0.000    |
