# Supplementary material
Source: MDPI journal article supplement (https://www.mdpi.com/2073-445X/11/4/464)
Supplement: s1 [file s1]

Table S2. Correlation ( $r$ ) of the physical-chemical properties of the soil with the axes of RDA, formed through the density of the families of the soil macrofauna of a savanna agroecosystem with maize crop associated with vegetal covers in the La Iguana station. Values in red indicate significant correlation ( $p < 0.05$ ;  $n = 21$ ).

| Parameter          | Value $r$ |       |       |
|--------------------|-----------|-------|-------|
|                    | Axs 1     | Axs 2 | Axs 3 |
| BD                 | -0.29     | -0.14 | 0.02  |
| TP                 | 0.59      | 0.31  | -0.32 |
| P <sub>macro</sub> | 0.00      | 0.24  | -0.27 |
| P <sub>micro</sub> | 0.61      | -0.16 | -0.03 |
| Ksat               | 0.46      | -0.36 | 0.11  |
| M                  | -0.04     | 0.04  | -0.06 |
| SOM                | -0.12     | -0.17 | -0.24 |
| pH                 | -0.15     | -0.07 | -0.02 |
| EC                 | -0.36     | 0.09  | 0.64  |
| P                  | -0.15     | -0.11 | 0.43  |
